# Supplementary material for: A comparative hidden Markov model analysis pipeline identifies proteins characteristic of cereal-infecting fungi
Source: PubMed Central journal article supplement (PMC3914424; doi:10.1186/1471-2164-14-807), 2013-11-20

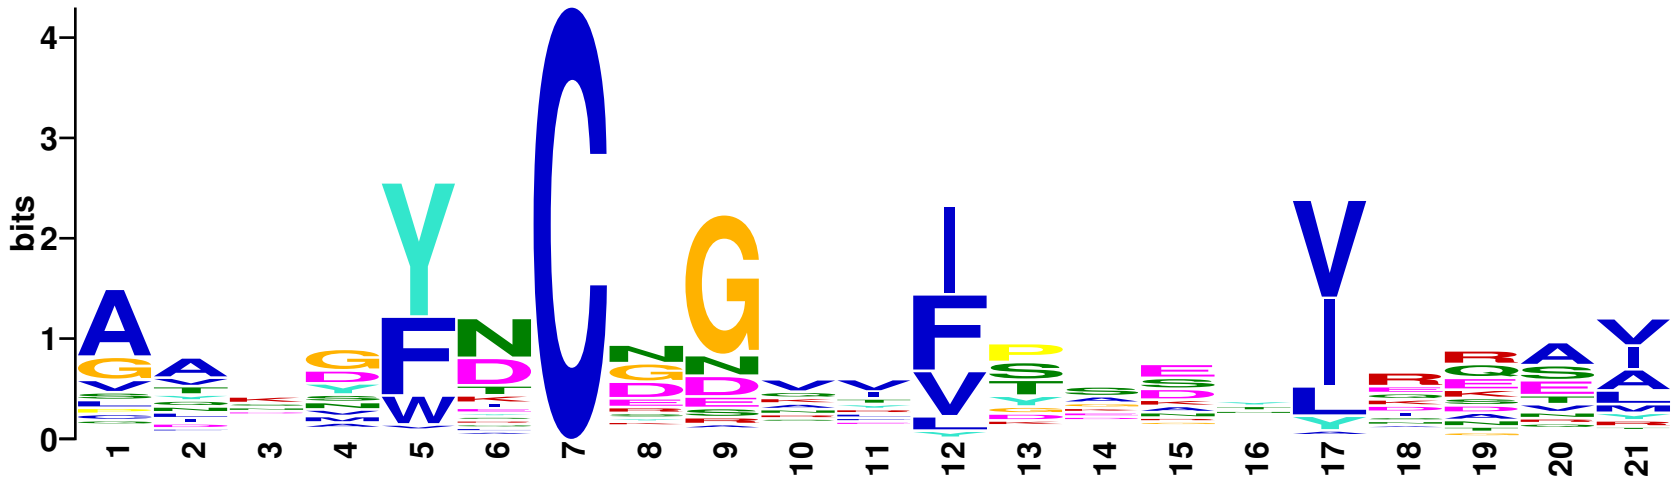

Supplement: 1471-2164-14-807-S8.pdf [file 1471-2164-14-807-S8.pdf]
